# Supplementary material for: Comparison of In-Hospital Outcomes between Early and Late Catheter-Directed Thrombolysis in Acute Pulmonary Embolism: A Retrospective Observational Study
Source: MDPI journal article supplement (doi:10.3390/jcm13041093), 2024-02-15
Supplement: s1 [file s1]

**Table S1**

International Classification of Diseases, 10th revision, clinical modification/procedure coding system

(ICD-10 CM/PCS) codes used for sampling (inclusion and exclusion criteria).

| Variable                                                    | ICD-10 | Code(s)                                                                                                                                                                                                                                                                                                                                                                                                                                                                                                                                                                     |                                                                         |
|-------------------------------------------------------------|--------|-----------------------------------------------------------------------------------------------------------------------------------------------------------------------------------------------------------------------------------------------------------------------------------------------------------------------------------------------------------------------------------------------------------------------------------------------------------------------------------------------------------------------------------------------------------------------------|-------------------------------------------------------------------------|
| Initial sampling (used in primary diagnosis fields)         |        |                                                                                                                                                                                                                                                                                                                                                                                                                                                                                                                                                                             |                                                                         |
| Pulmonary embolism                                          | CM     | Saddle embolism                                                                                                                                                                                                                                                                                                                                                                                                                                                                                                                                                             | With acute core pulmonal: I26.02<br>Without acute core pulmonal: I26.92 |
|                                                             |        | Other (non-saddle embolism)                                                                                                                                                                                                                                                                                                                                                                                                                                                                                                                                                 | With acute core pulmonal: I26.09<br>Without acute core pulmonal: I26.99 |
|                                                             |        | Subsegmental PE without core pulmonal                                                                                                                                                                                                                                                                                                                                                                                                                                                                                                                                       | Single: I26.93<br>Multiple: I26.94                                      |
|                                                             |        | PE in pregnancy, labor and puerperium                                                                                                                                                                                                                                                                                                                                                                                                                                                                                                                                       | O88.2, O88.211, O88.212, O88.213, O88.219, O88.22, O88.23               |
| Procedures (used in all procedure fields)                   |        |                                                                                                                                                                                                                                                                                                                                                                                                                                                                                                                                                                             |                                                                         |
| Catheter directed thrombolysis                              | PCS    | 3E06317                                                                                                                                                                                                                                                                                                                                                                                                                                                                                                                                                                     |                                                                         |
| Ultrasound-facilitated catheter-directed thrombolysis       | PCS    | 6A750Z5 ,6A750Z6, 6A750Z7, 6A750ZZ, 6A751Z5, 6A751Z6, 6A751Z7, 6A751ZZ                                                                                                                                                                                                                                                                                                                                                                                                                                                                                                      |                                                                         |
| Exclusion criteria (used in all secondary diagnosis fields) |        |                                                                                                                                                                                                                                                                                                                                                                                                                                                                                                                                                                             |                                                                         |
| Acute limb ischemia                                         | CM     | I743, I745, I748, I749, I7502, I75021, I75022, I75023, I75029                                                                                                                                                                                                                                                                                                                                                                                                                                                                                                               |                                                                         |
| Acute limb ischemia                                         | CM     | G43601, G43609, G43611, G43619, I6300, I63011, I63012, I63013, I63019, I6302, I63031, I63032, I63033, I63539, I63541, I63542, I63543, I63549, I6359, I636, I638, I6381, I6389, I639, I97810, I97811, I97820, I97821, R29700, R29701, R29702, R29703, R29704, R29705, R29706, R29707, R29708, R29709, R29710, R29711, R29712, R29713, R29714, R29715, R29716, R29717, R29718, R29719, R29720, R29721, R29722, R29723, R29724, R29725, R29726, R29727, R29728, R29729, R29730, R29731, R29732, R29733, R29734, R29735, R29736, R29737, R29738, R29739, R29740, R29741, R29742 |                                                                         |

|                   |                     |     |                                                                                                                                                                                                                                                                                                                                                                                                                                                                                                                                                                                                                                                                                                                                                                                                                                                                                                                                                                                                                                                                                                                                                                                                                                                                                                                                              |
|-------------------|---------------------|-----|----------------------------------------------------------------------------------------------------------------------------------------------------------------------------------------------------------------------------------------------------------------------------------------------------------------------------------------------------------------------------------------------------------------------------------------------------------------------------------------------------------------------------------------------------------------------------------------------------------------------------------------------------------------------------------------------------------------------------------------------------------------------------------------------------------------------------------------------------------------------------------------------------------------------------------------------------------------------------------------------------------------------------------------------------------------------------------------------------------------------------------------------------------------------------------------------------------------------------------------------------------------------------------------------------------------------------------------------|
| Revascularization | Stent & Angioplasty | PCS | <p>Percutaneous coronary stenting:</p> <p>“Dilation” ICD wording:</p> <p>027034x(6,Z), 027035x(6,Z), 027036x(6,Z),<br/> 027037x(6,Z), 02703Dx(6,Z), 02703Ex(6,Z), 02703Fx(6,Z),<br/> 02703Gx(6,Z), 027134x(6,Z), 027135x(6,Z), 027136x(6,Z),<br/> 027137x(6,Z), 02713Dx(6,Z), 02713Ex(6,Z), 02713Fx(6,Z),<br/> 02713Gx(6,Z), 027234x(6,Z), 027235x(6,Z), 027236x(6,Z),<br/> 027237x(6,Z), 02723Dx(6,Z), 02723Ex(6,Z), 02723Fx(6,Z),<br/> 02723Gx(6,Z), 027334x(6,Z), 027335x(6,Z), 027336x(6,Z),<br/> 027337x(6,Z), 02733Dx(6,Z), 02733Ex(6,Z), 02733Fx(6,Z),<br/> 02733Gx(6,Z)</p> <p>“Insertion” ICD wording (only intraluminal device; excluded insertion of “other” device):</p> <p>02H03DZ, 02H13DZ, 02H23DZ, 02H33DZ</p> <p>Angioplasty:</p> <p>02703Zx(6,Z), 02713Zx(6,Z), 02723Zx(6,Z), 02733Zx(6,Z)</p>                                                                                                                                                                                                                                                                                                                                                                                                                                                                                                                             |
|                   | CABG                | PCS | <p>021008x(3,8,9,C,F,W), 021009x(3,8,9,C,F,W),<br/> 02100Ax(3,8,9,C,F,W), 02100Jx(3,8,9,C,F,W),<br/> 02100Kx(3,8,9,C,F,W), 02100Zx(3,8,9,C,F), 02103x(44,D4),<br/> 0210444, 021048x(3,8,9,C,F,W), 021049x(3,8,9,C,F,W),<br/> 02104Ax(3,8,9,C,F,W), 02104Jx(3,8,9,C,F,W),<br/> 02104Kx(3,8,9,C,F,W), 02104Zx(3,8,9,C,F), 02104D4,<br/> 021108x(3,8,9,C,F,W), 021109x(3,8,9,C,F,W),<br/> 02110Ax(3,8,9,C,F,W), 02110Jx(3,8,9,C,F,W),<br/> 02110Kx(3,8,9,C,F,W), 02110Zx(3,8,9,C,F), 02113x(44,D4),<br/> 0210444, 021148x(3,8,9,C,F,W), 021149x(3,8,9,C,F,W),<br/> 02114Ax(3,8,9,C,F,W), 02114Jx(3,8,9,C,F,W),<br/> 02114Kx(3,8,9,C,F,W), 02114Zx(3,8,9,C,F), 02114D4,<br/> 021208x(3,8,9,C,F,W), 021209x(3,8,9,C,F,W),<br/> 02120Ax(3,8,9,C,F,W), 02120Jx(3,8,9,C,F,W),<br/> 02120Kx(3,8,9,C,F,W), 02120Zx(3,8,9,C,F), 02123x(44,D4),<br/> 0212444, 021248x(3,8,9,C,F,W), 021249x(3,8,9,C,F,W),<br/> 02124Ax(3,8,9,C,F,W), 02124Jx(3,8,9,C,F,W),<br/> 02124Kx(3,8,9,C,F,W), 02124Zx(3,8,9,C,F), 02124D4,<br/> 021308x(3,8,9,C,F,W), 021309x(3,8,9,C,F,W),<br/> 02130Ax(3,8,9,C,F,W), 02130Jx(3,8,9,C,F,W),<br/> 02130Kx(3,8,9,C,F,W), 02130Zx(3,8,9,C,F), 02133x(44,D4),<br/> 0213444, 021348x(3,8,9,C,F,W), 021349x(3,8,9,C,F,W),<br/> 02134Ax(3,8,9,C,F,W), 02134Jx(3,8,9,C,F,W),<br/> 02134Kx(3,8,9,C,F,W), 02134Zx(3,8,9,C,F), 02134D4</p> |

|  |                             |     |                                                                                                                                                                                                                                                                                                                                                                                                                                                                                                                                                                                                                                                                                                                                                                                                                                                                                                                                                                                                                                                                                                                                                                                                                                                                                                                                                                     |
|--|-----------------------------|-----|---------------------------------------------------------------------------------------------------------------------------------------------------------------------------------------------------------------------------------------------------------------------------------------------------------------------------------------------------------------------------------------------------------------------------------------------------------------------------------------------------------------------------------------------------------------------------------------------------------------------------------------------------------------------------------------------------------------------------------------------------------------------------------------------------------------------------------------------------------------------------------------------------------------------------------------------------------------------------------------------------------------------------------------------------------------------------------------------------------------------------------------------------------------------------------------------------------------------------------------------------------------------------------------------------------------------------------------------------------------------|
|  | Other<br>revascularizations | PCS | 027004x(6,Z), 027005x(6,Z), 027006x(6,Z),<br>027007x(6,Z), 02700Dx(6,Z), 02700Ex(6,Z), 02700Fx(6,Z),<br>02700Gx(6,Z), 02700Tx(6,Z),<br>02703Tx(6,Z), 027044x(6,Z), 027045x(6,Z), 027046x(6,Z),<br>027047x(6,Z), 02704Dx(6,Z), 02704Ex(6,Z), 02704Fx(6,Z),<br>02704Gx(6,Z), 02704Tx(6,Z), 027104x(6,Z), 027105x(6,Z),<br>027106x(6,Z), 027107x(6,Z), 02710Dx(6,Z), 02710Ex(6,Z),<br>02710Fx(6,Z), 02710Gx(6,Z), 02710Tx(6,Z),<br>02713Tx(6,Z), 027144x(6,Z), 027145x(6,Z), 027146x(6,Z),<br>027147x(6,Z), 02714Dx(6,Z), 02714Ex(6,Z), 02714Fx(6,Z),<br>02714Gx(6,Z), 02714Tx(6,Z), 027204x(6,Z), 027205x(6,Z),<br>027206x(6,Z), 027207x(6,Z), 02720Dx(6,Z), 02720Ex(6,Z),<br>02720Fx(6,Z), 02720Gx(6,Z), 02720Tx(6,Z),<br>02723Tx(6,Z), 027244x(6,Z), 027245x(6,Z), 027246x(6,Z),<br>027247x(6,Z), 02724Dx(6,Z), 02724Ex(6,Z), 02724Fx(6,Z),<br>02724Gx(6,Z), 02724Tx(6,Z), 027304x(6,Z), 027305x(6,Z),<br>027306x(6,Z), 027307x(6,Z), 02730Dx(6,Z), 02730Ex(6,Z),<br>02730Fx(6,Z), 02730Gx(6,Z), 02730Tx(6,Z), 02733Tx(6,Z),<br>027344x(6,Z), 027345x(6,Z), 027346x(6,Z),<br>027347x(6,Z), 02734Dx(6,Z), 02734Ex(6,Z), 02734Fx(6,Z),<br>02734Gx(6,Z), 02734Tx(6,Z), 02H00DZ, 02H04DZ, 02H10DZ,<br>02H14DZ, 02H20DZ, 02H24DZ, 02H30DZ, 02H34DZ,<br>02700Zx(6,Z), 02704Zx(6,Z), 02710Zx(6,Z), 02714Zx(6,Z),<br>02720Zx(6,Z), 02724Zx(6,Z), 02730Zx(6,Z), 02734Zx(6,Z) |
|--|-----------------------------|-----|---------------------------------------------------------------------------------------------------------------------------------------------------------------------------------------------------------------------------------------------------------------------------------------------------------------------------------------------------------------------------------------------------------------------------------------------------------------------------------------------------------------------------------------------------------------------------------------------------------------------------------------------------------------------------------------------------------------------------------------------------------------------------------------------------------------------------------------------------------------------------------------------------------------------------------------------------------------------------------------------------------------------------------------------------------------------------------------------------------------------------------------------------------------------------------------------------------------------------------------------------------------------------------------------------------------------------------------------------------------------|

**Table S2**

International Classification of Diseases, 10th revision, clinical modification/procedure coding system

(ICD-10 CM/PCS) codes used for the complications identification.

|                         |     |                                                                                                                                                                                                                                                                                                                                                                                                                                                                                                      |
|-------------------------|-----|------------------------------------------------------------------------------------------------------------------------------------------------------------------------------------------------------------------------------------------------------------------------------------------------------------------------------------------------------------------------------------------------------------------------------------------------------------------------------------------------------|
| Acute kidney injury     | CM  | N17.xx                                                                                                                                                                                                                                                                                                                                                                                                                                                                                               |
| Vasopressors use        | PCS | 3E030XZ, 3E033XZ, 3E040XZ, 3E043XZ                                                                                                                                                                                                                                                                                                                                                                                                                                                                   |
| Peripheral thrombolysis | PCS | 3E03317                                                                                                                                                                                                                                                                                                                                                                                                                                                                                              |
| Blood transfusion       | PCS | 30230H0, 30230H1, 30230N0, 30230N1, 30230P0, 30230P1, 30233H0, 30233H1, 30233N0, 30233N1, 30233P0, 30233P1, 30240H0, 30240H1, 30240N0, 30240N1, 30240P0, 30240P1, 30243H0, 30243H1, 30243N0, 30243N1, 30243P0, 30243P1, 30250H0, 30250H1, 30250N0, 30250N1, 30250P0, 30250P1, 30253H0, 30253H1, 30253N0, 30253N1, 30253P0, 30253P1, 30260H0, 30260H1, 30260N0, 30260N1, 30260P0, 30260P1, 30263H0, 30263H1, 30263N0, 30263N1, 30263P0, 30263P1, 30273H1, 30273N1, 30273P1, 30277H1, 30277N1, 30277P1 |
| Intracranial hemorrhage | CM  | Non-traumatic subarachnoid hemorrhage: I60 (I60.0 – I60.9)<br>Non-traumatic intracerebral hemorrhage: I61 (I61.0 – I61.9)<br>Non-traumatic acute subdural hemorrhage: I62.01                                                                                                                                                                                                                                                                                                                         |
| Cardiac arrest          | PCS | In hospital cardiopulmonary resuscitation (5A12012)<br>In hospital shock to restore cardiac rhythm (5A2204Z)                                                                                                                                                                                                                                                                                                                                                                                         |
| Cardiogenic shock       | CM  | R57.0                                                                                                                                                                                                                                                                                                                                                                                                                                                                                                |
| ECMO use                | PCS | Before October 2018: 5A15223<br>After October 2018: 5A1522F, 5A1522G, 5A1522H                                                                                                                                                                                                                                                                                                                                                                                                                        |
| Intubation              | PCS | Insertion of a tracheal airway: 0BH17EZ<br>Insertion of endotracheal airway into trachea: 0BH18EZ                                                                                                                                                                                                                                                                                                                                                                                                    |
| Mechanical ventilation  | PCS | 5A1935Z Respiratory Ventilation, less than 24 Consecutive Hours<br><br>5A1945Z Respiratory Ventilation, 24-96 Consecutive Hours<br><br>5A1955Z Respiratory Ventilation, greater than 96 Consecutive Hours                                                                                                                                                                                                                                                                                            |

**Table S3**

International Classification of Diseases,10th revision, clinical modification/procedure coding system

(ICD-10 CM/PCS) codes used for the comorbidities identification.

| Variable                       | ICD-10 | Code(s)                                                                                   |
|--------------------------------|--------|-------------------------------------------------------------------------------------------|
| Hypertension                   | CM     | I10.xx + I11.xx + I12.xx + I13.xx + I15.xx + I16.xx                                       |
| Diabetes                       | CM     | E08-13.xx                                                                                 |
| Hyperlipidemia                 | CM     | E78.xx (0-5)                                                                              |
| Chronic ischemic heart disease | CM     | I25.xx                                                                                    |
| COPD                           | CM     | J41-47                                                                                    |
| Peripheral vascular disease    | CM     | I70.x, I71.x, I73.1, I73.8, I73.9, I77.1, I79.0, I79.2, K55.1, K55.8, K55.9, Z95.8, Z95.9 |
| Smoking status                 | CM     | F17.xx + Z72.0 + Z87.891                                                                  |
| Heart failure                  | CM     | I50.xx; I11.0; I13.2                                                                      |
| Renal disease                  | CM     | I12.0, I13.1, N03.2–N03.7, N05.2–N05.7, N18.x, N19.x, N25.0, Z49.0–Z49.2, Z94.0, Z99.2    |
| Obesity                        | CM     | E66.xx except E66.3                                                                       |
